# Supplementary material for: An efficient microwave-assisted green transformation of cellulose into levoglucosenone. Advantages of the use of an experimental design approach
Source: Royal Society of Chemistry journal article supplement (doi:10.1039/b703690f), 2007-01-01

# <sup>1</sup>H NMR spectra of a crude mixture of the pyrolytic product

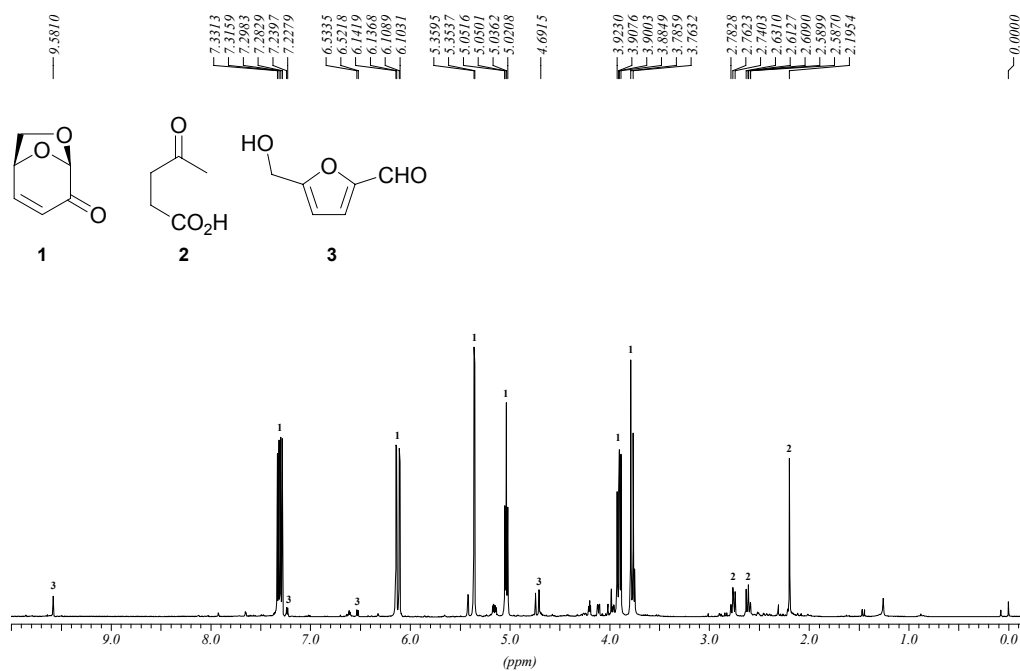

# GC-chromatogram of a crude mixture of the pyrolytic product

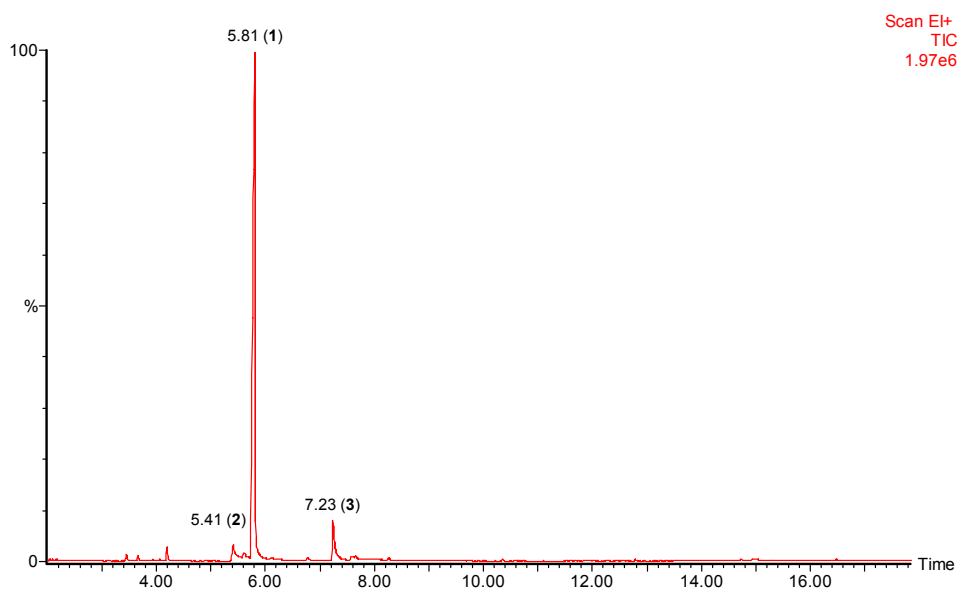

Supplement: b703690f.pdf [file b703690f.pdf]
